# Supplementary material
Source: MDPI journal article supplement (https://www.mdpi.com/2075-163X/13/9/1182)
Supplement: s1 [file s1]

# Supplementary Material: Paint, Colour, and Style: The Contribution of Minerals to the Palette of the Descent from the Cross, Attributed to the Portuguese Painter Francisco João (act. 1558–1595)

Helena P. Melo <sup>1,2</sup>, António João Cruz <sup>1,3,\*</sup>, Jana Sanyova <sup>4</sup>, Sara Valadas <sup>1,2</sup> and Ana Margarida Cardoso <sup>1,2</sup>

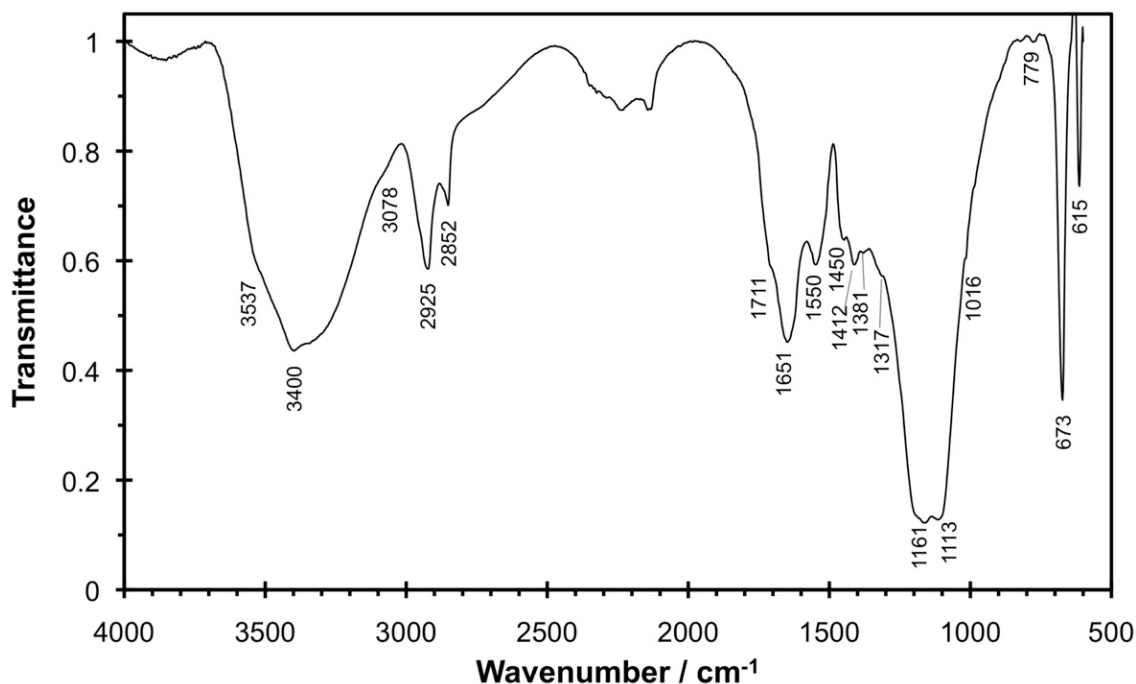

**Figure S1.** FTIR spectrum of the ground layer of sample #13: sulfates (3537–3400, 1161, 1113, 1016, 673, 615 cm<sup>-1</sup>), oxalates (1317, 779 cm<sup>-1</sup>), proteins (3078, 1651, 1550, 1450 cm<sup>-1</sup>), lipids (2925, 2852, 1711 cm<sup>-1</sup>). The lipids most probably result from absorption of the *imprimitura* binder applied on top of the ground.

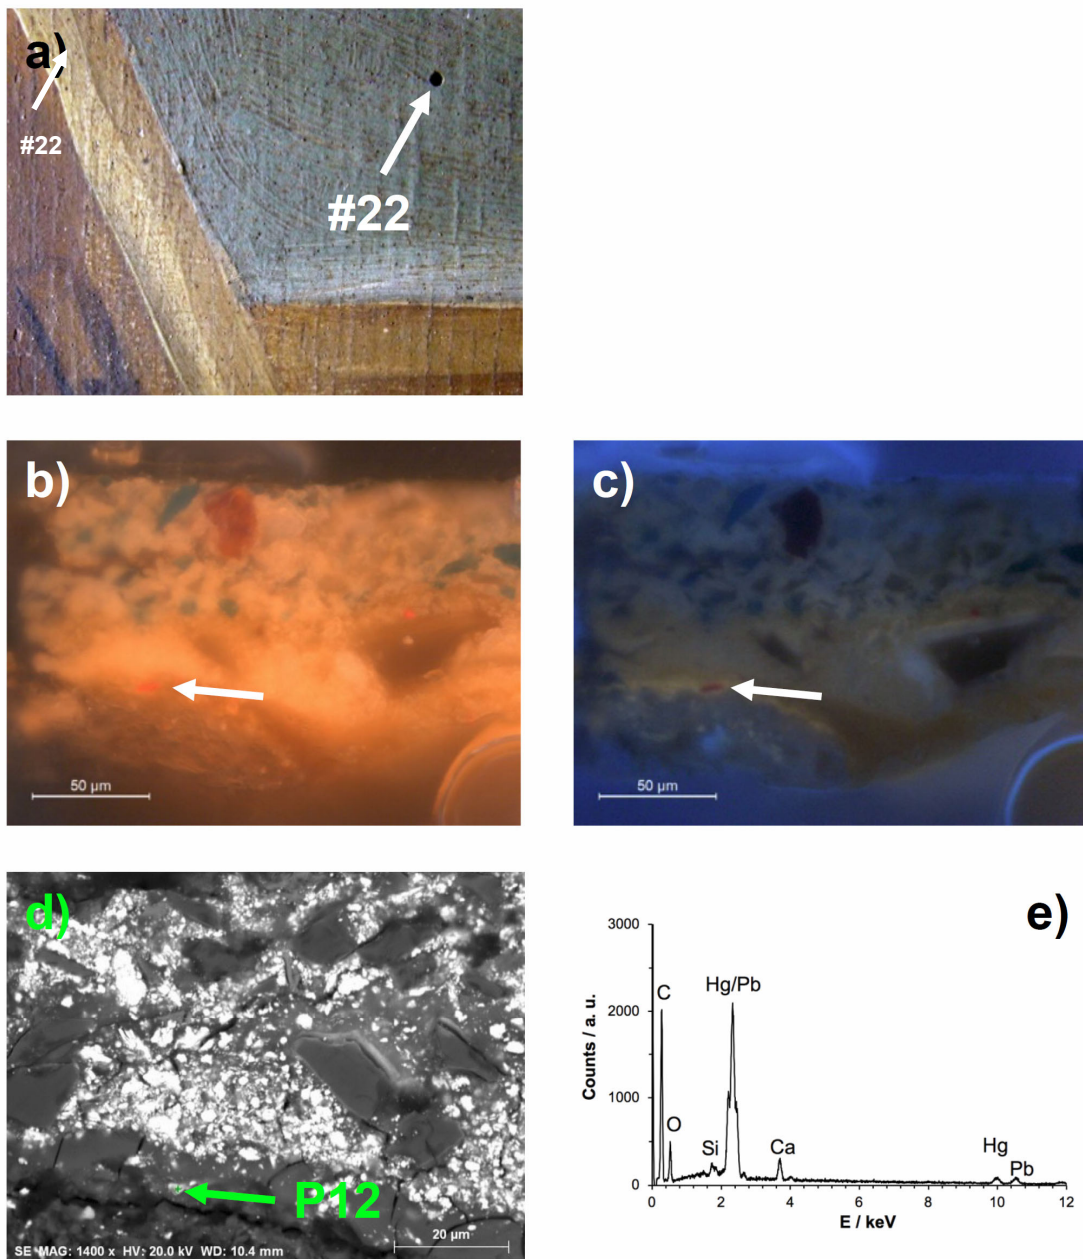

**Figure S2.** Detail of the area of the sky with location of sample #22 (a); cross-section of sample #22 under OM-Vis (b); cross-section of sample #22 under OM-UV (c); SEM-BSE image of detail from b) and c) (d); and SEM-EDX spectrum of P12 (e). The arrow in b), c) and d) indicates the particle P12, of vermillion. The medium-rich *imprimitura* containing the vermillion particle exhibits a yellow fluorescence under OM-UV (c).

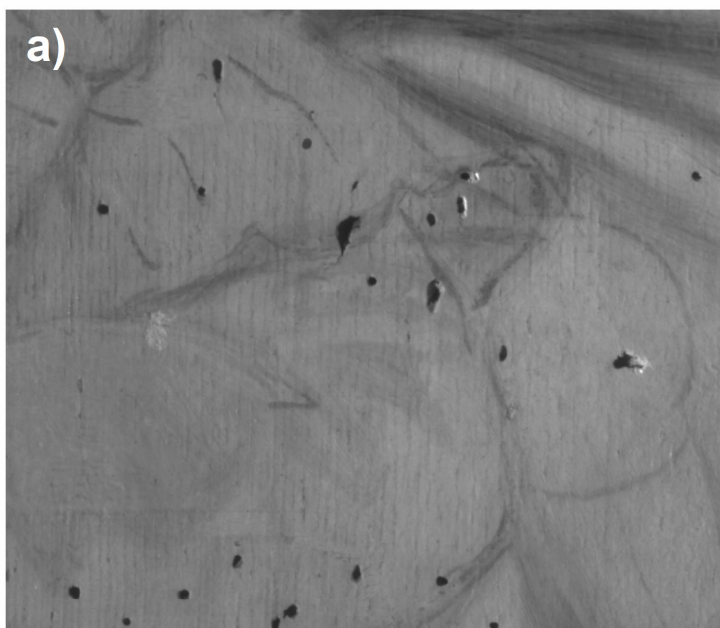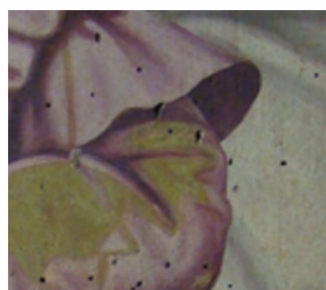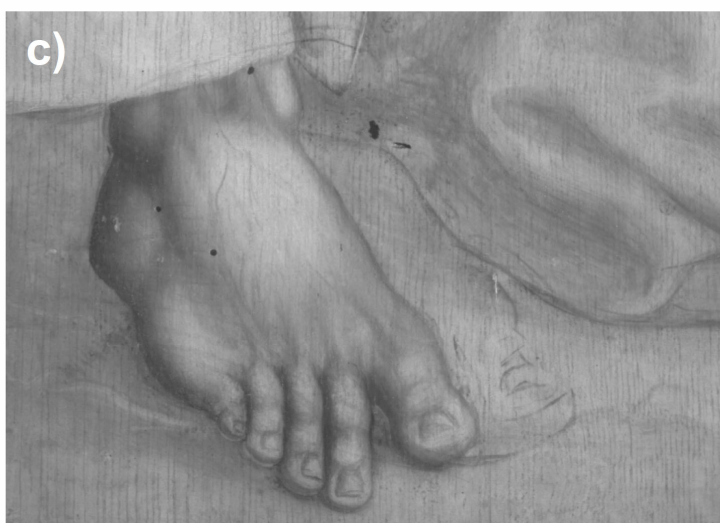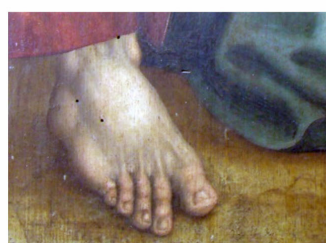

**Figure S3.** Details under IRR (a, c) and, under visible radiation (b, d).

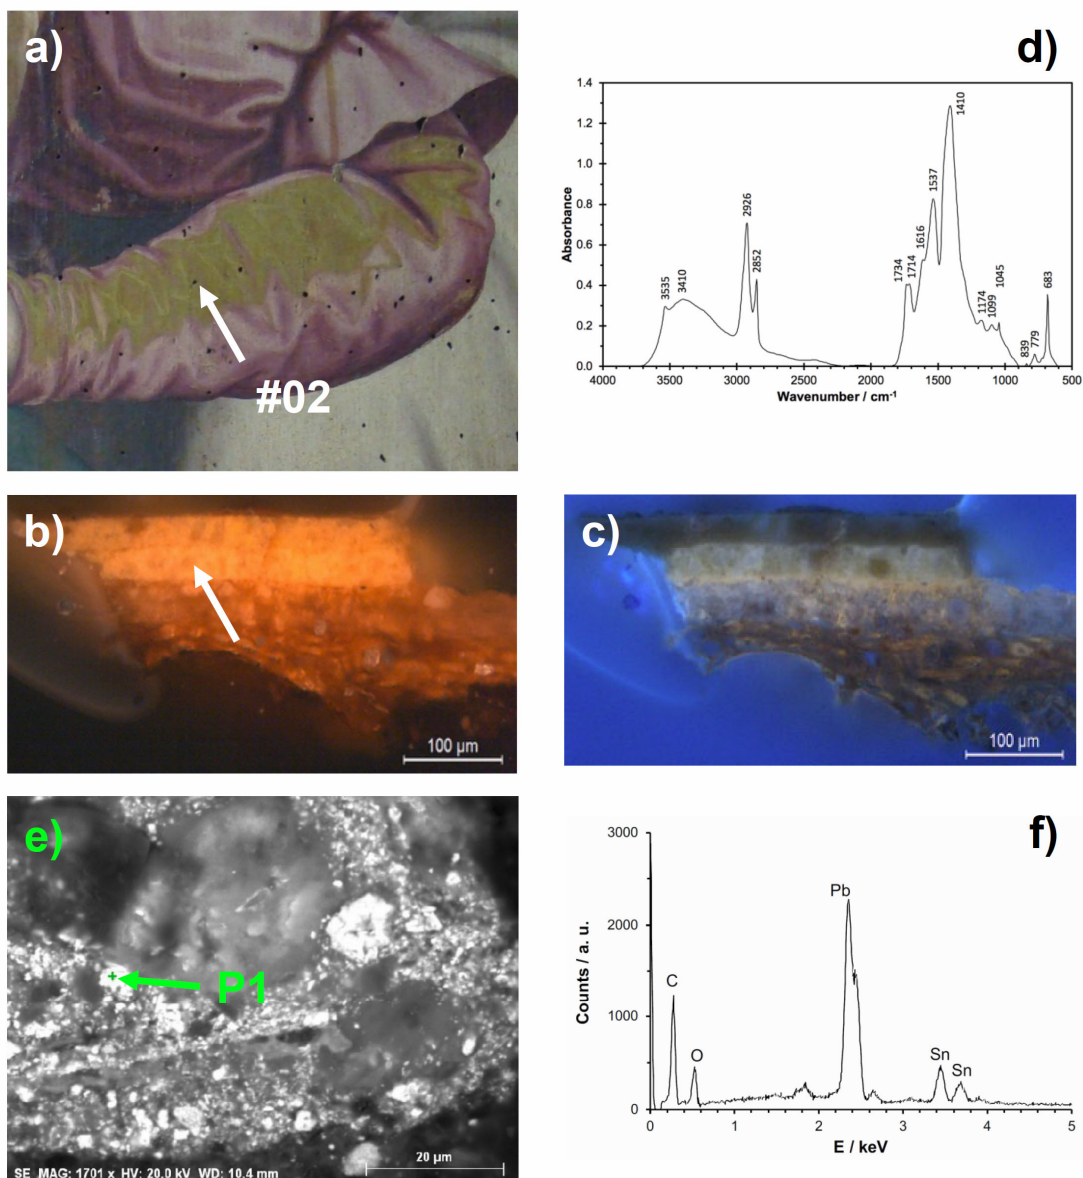

**Figure S4.** Detail of the drapery in Saint Magdalene's arm with location of sample #02 (a); cross-section of sample #02 under OM-Vis (b); cross-section of sample #02 under OM-UV (c); and FTIR spectrum of yellow layer marked in b) with an arrow (d). According to the SEM-EDX results, this layer is rich in lead white and lead-tin yellow: SEM-BSE image of detail of cross-section from sample #02 with location with an arrow of the particle P1 analysed (e); and respective SEM-EDX spectrum (f). On the FTIR spectrum, lead white is detected due to the presence of carbonate bands at 1410, 1045, and 683  $\text{cm}^{-1}$ , along with a  $\nu(\text{OH})$  distension at 3535  $\text{cm}^{-1}$  for hydrocerussite and the characteristic strong 839  $\text{cm}^{-1}$  stretching band for cerussite. Lead soaps present as can be seen by the strong  $\nu_a(\text{COO}^-)$  band at 1537  $\text{cm}^{-1}$ . The carbonyl  $\nu(\text{C}=\text{O})$  bands at 1734, 1714  $\text{cm}^{-1}$  along with two sharp bands at 2926  $\text{cm}^{-1}$  and 2852  $\text{cm}^{-1}$ , due respectively to stretching  $\text{CH}_3$  and  $\text{CH}_2$  vibrations, identify an aged oil. The broad band centered at 3410  $\text{cm}^{-1}$  can be assigned to alcohol and/or hydroperoxide vibrations formed during the ageing of oil.



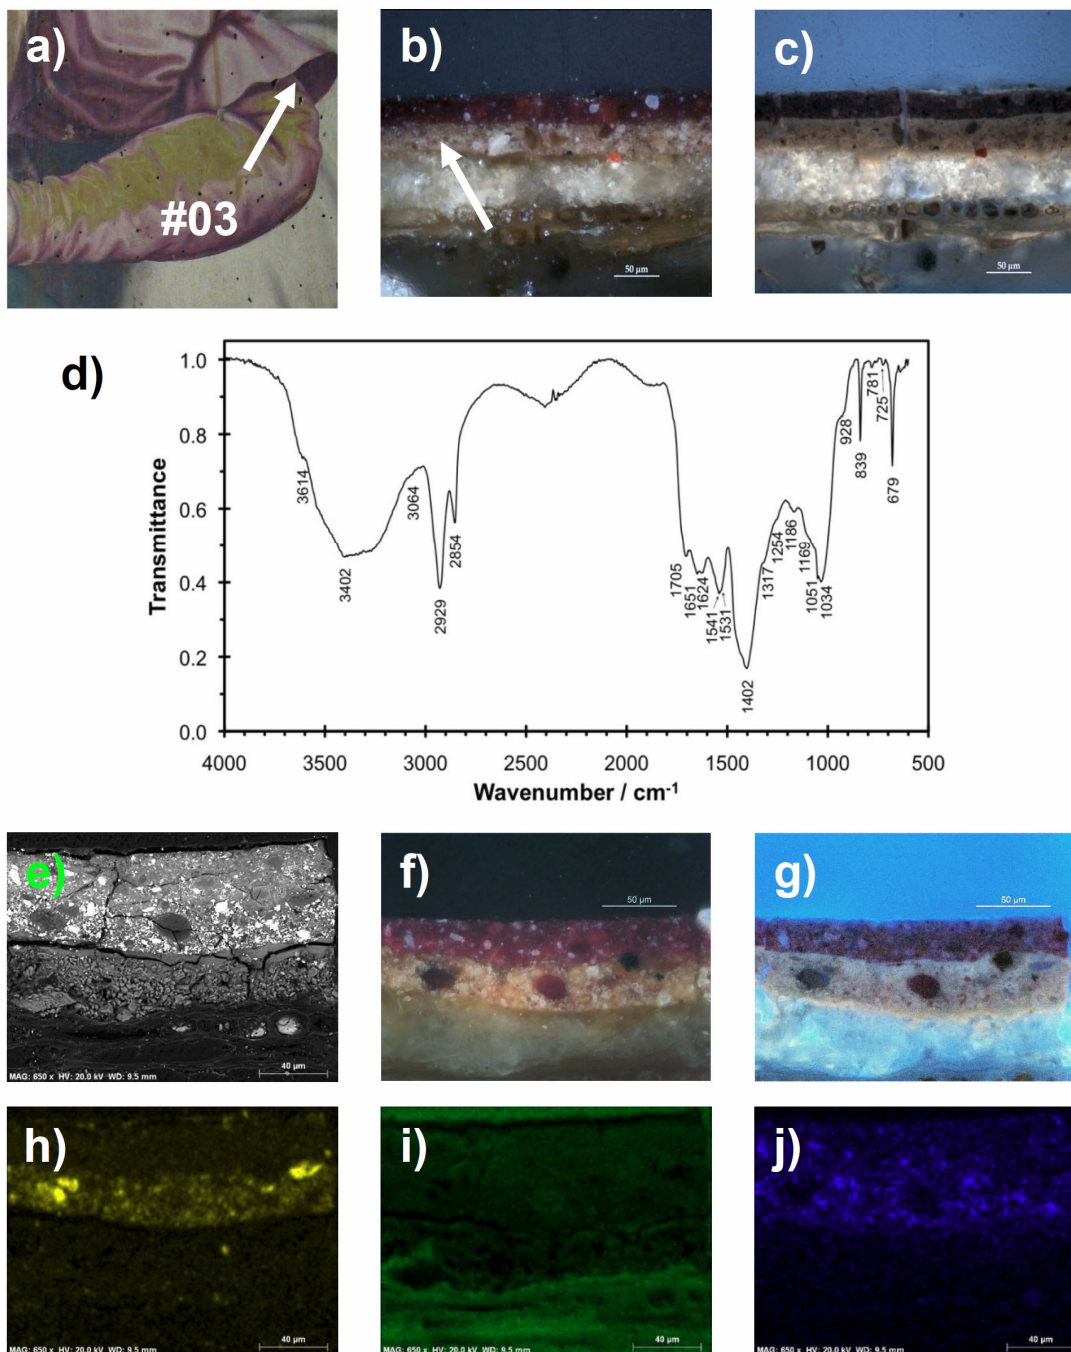

**Figure S5.** Detail of the tunic of Saint Magdalene with location of sample #03 (a); cross-section of sample #03 under OM-Vis (b); cross-section of sample #03 under OM-UV (c); and FTIR spectrum of pink-ochre paint marked in b) with an arrow (d). A red particle of vermilion can be seen in the *imprimatura* layer (b and c). According to the SEM-EDX results, the layer is rich in lead white and a red lake: SEM-BSE image of detail of cross-section of sample #03 (e); same detail under OM-Vis (f) and under OM-UV (g); SEM-EDX maps of Al (h), C (i), and Pb (j). On the FTIR spectrum, lead white is detected due to the presence of carbonate bands at 1402, 1051, and 679 cm<sup>-1</sup>, along with the characteristic strong 839 cm<sup>-1</sup> stretching band for cerussite. The ν(OH) distortion at 3535 cm<sup>-1</sup> for hydrocerussite appears as a shoulder in the 3402 cm<sup>-1</sup> band. Lead soaps are identified by the strong ν<sub>a</sub>(COO<sup>-</sup>) band at 1541 cm<sup>-1</sup>. The glazes contained ground glass particles: ν<sub>a</sub>(Si-O-Si) bands at 1053–1049 cm<sup>-1</sup> with a shoulder at 1097–1088 cm<sup>-1</sup>, and a smaller ν<sub>s</sub>(Si-O-Si) band at 781 cm<sup>-1</sup> can be ascribed to glass, and the band at 928 cm<sup>-1</sup> can be to network modifiers in the glass. The carbonyl ν(C=O) bands at 1705 cm<sup>-1</sup> along with two sharp bands at 2929 cm<sup>-1</sup> and 2854 cm<sup>-1</sup>, due respectively

to stretching  $\text{CH}_3$  and  $\text{CH}_2$  vibrations, identify an aged oil. The broad band centered at  $3402\text{ cm}^{-1}$  can be assigned to alcohol and/or hydroperoxide vibrations formed during the ageing of oil. Oxalates resulting from degradation of the organic binding medium can be seen due to the bands at  $1317\text{ cm}^{-1}$   $\nu_a(\text{C-O})$  and  $781\text{ cm}^{-1}$   $\delta(\text{O-C=O})$ , with a broad band centred at  $1651\text{ cm}^{-1}$   $\nu_s(\text{C=O})$ .

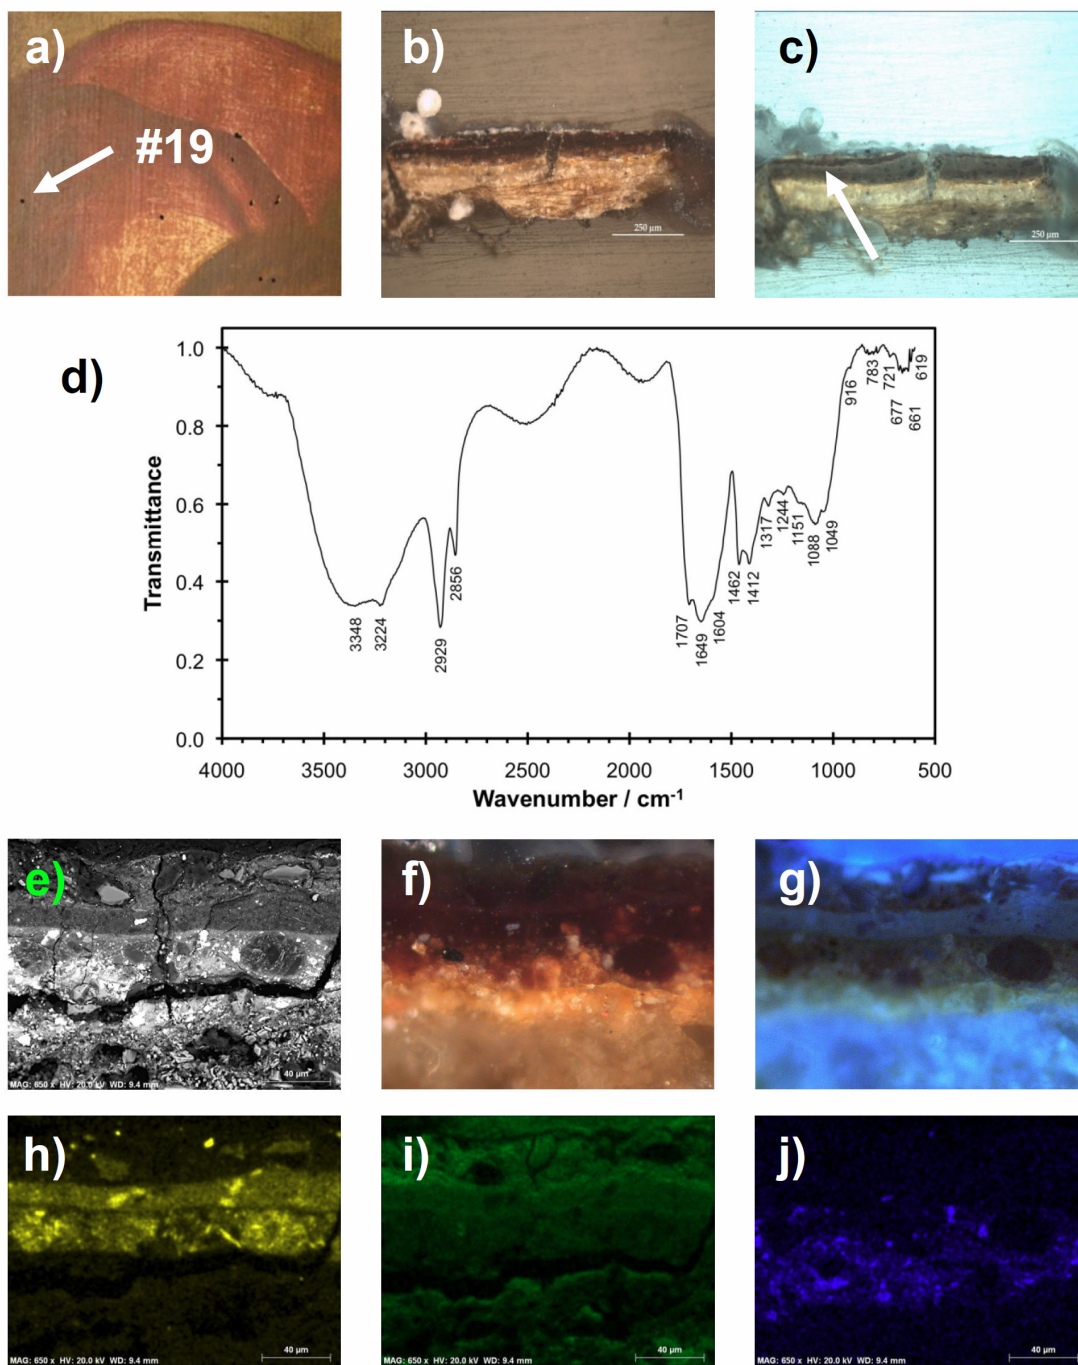

**Figure S6.** Detail of the cloak of Saint John with location of sample #19 (a); cross-section of sample #19 under OM-Vis (b); cross-section of sample #19 under OM-UV (c); and FTIR spectrum of the red glaze marked in c) with an arrow (d). The composition of the layer shown by the SEM-EDX spectrum is characteristic of a lake: SEM-BSE image of detail of cross-section of sample #19 (e); same detail under OM-Vis (f) and under OM-UV (g); SEM-EDS maps of Al (h), C (i), and Pb (j). On the FTIR

spectrum, the glazes contained ground glass particles that can be identified by the  $\nu_a(\text{Si-O-Si})$  bands at  $1049\text{ cm}^{-1}$  and  $1088\text{ cm}^{-1}$ , and a smaller  $\nu_s(\text{Si-O-Si})$  band at  $783\text{ cm}^{-1}$ . The band at  $916\text{ cm}^{-1}$  can be to network modifiers in the glass. The carbonyl  $\nu(\text{C=O})$  bands at  $1707\text{ cm}^{-1}$  along with two sharp bands at  $2929\text{ cm}^{-1}$  and  $2856\text{ cm}^{-1}$ , due respectively to stretching  $\text{CH}_3$  and  $\text{CH}_2$  vibrations, identify an aged oil. The broad band centered at  $3348\text{ cm}^{-1}$  can be assigned to alcohol and/or hydroperoxide vibrations formed during the ageing of oil. Oxalates resulting from degradation of the organic binding medium can be seen due to the bands at  $1317\text{ cm}^{-1}$   $\nu_a(\text{C-O})$  and  $783\text{ cm}^{-1}$   $\delta(\text{O-C=O})$ , with a broad band centred at  $1649\text{ cm}^{-1}$   $\nu_s(\text{C=O})$ .

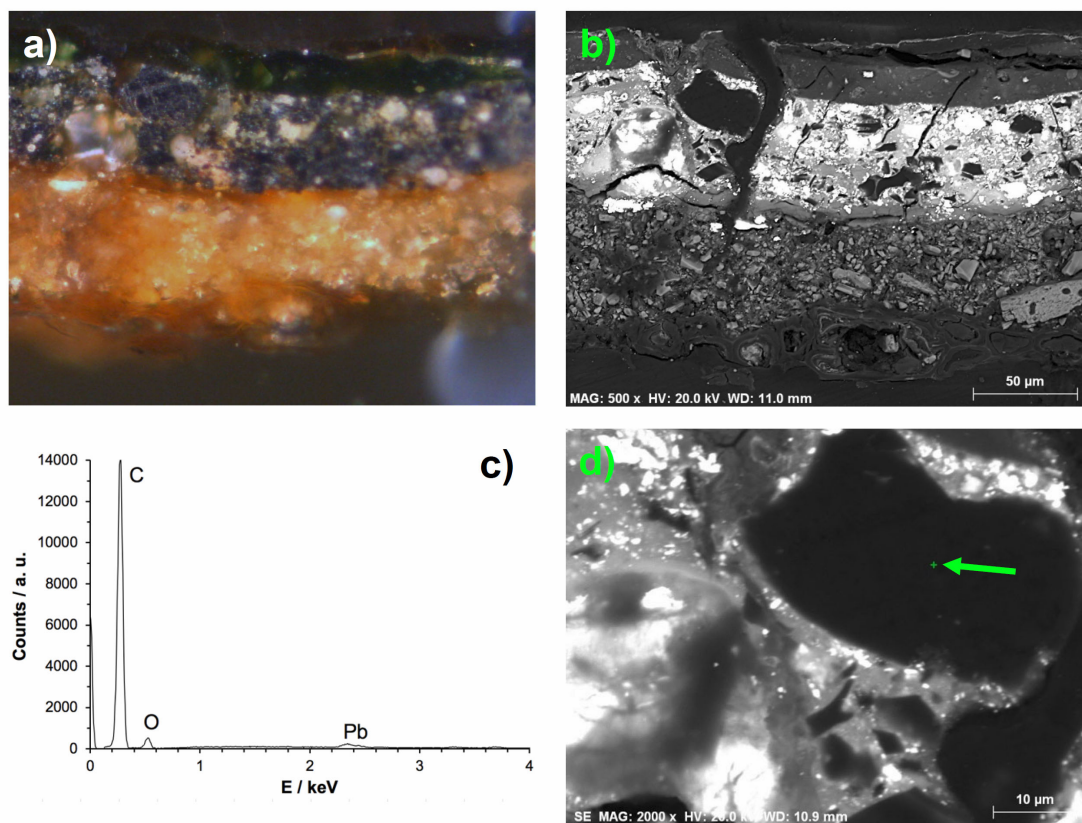

**Figure S7.** Cross-section of sample #11, corresponding to a green drapery, under OM-Vis (a); cross-section of sample #11 under SEM-BSE (b); SEM-EDX spectrum of charcoal particle (c) viewed in the SEM-BSE image (d).



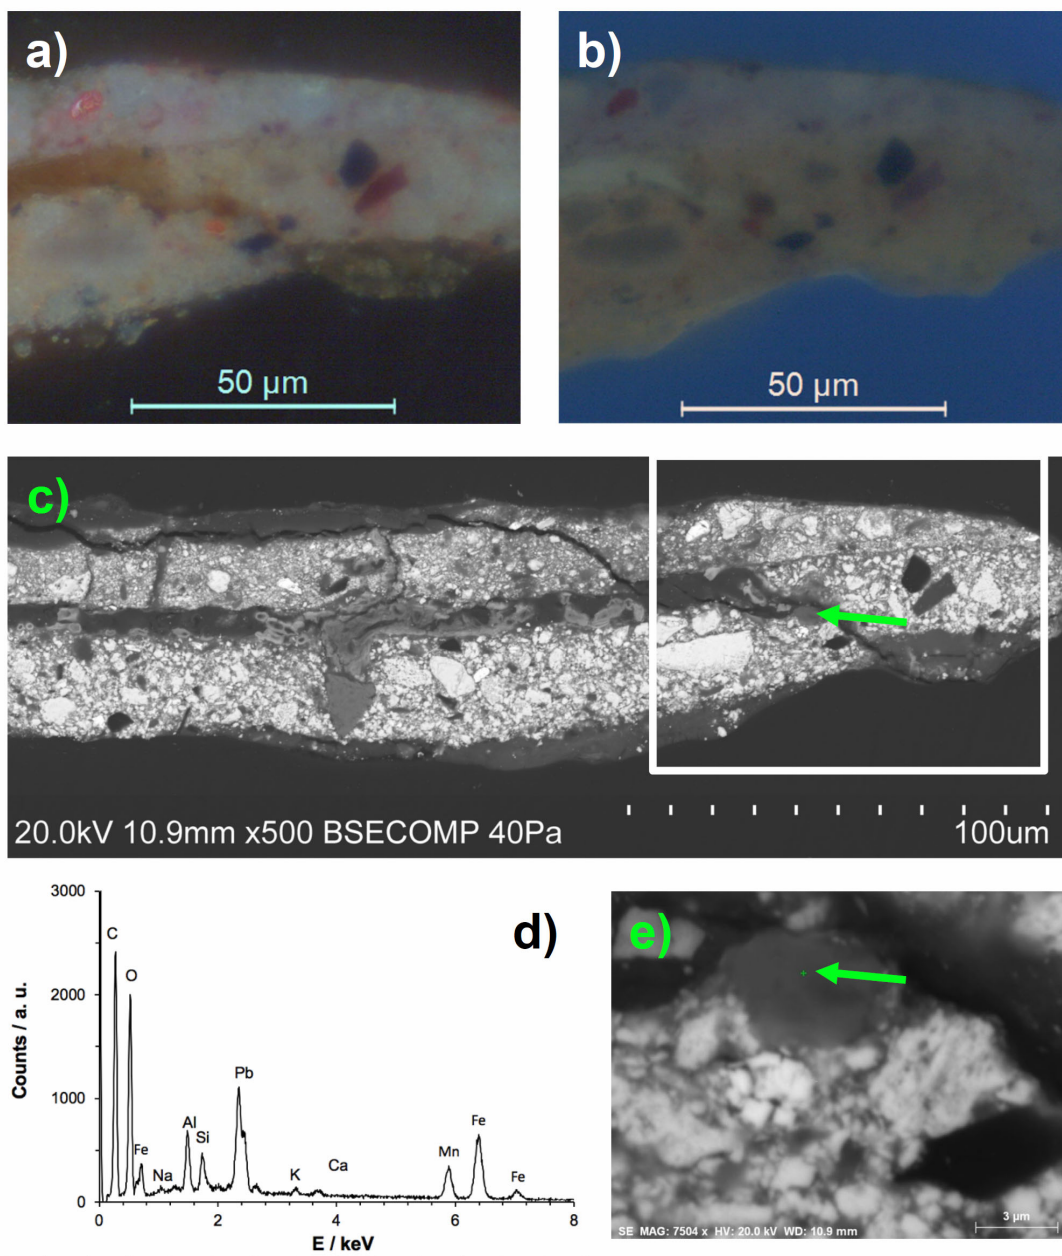

**Figure S8.** Detail of cross-section of sample #04, corresponding to the flesh of Saint Magdalene's face, under OM-Vis (a); detail of cross-section of sample #04 under OM-UV (b); SEM-BSE image of cross section of sample #04 with the location of the detail shown in a) and b) (c); SEM-EDX spectrum of umber particle (d) viewed in the SEM-BSE image (e).



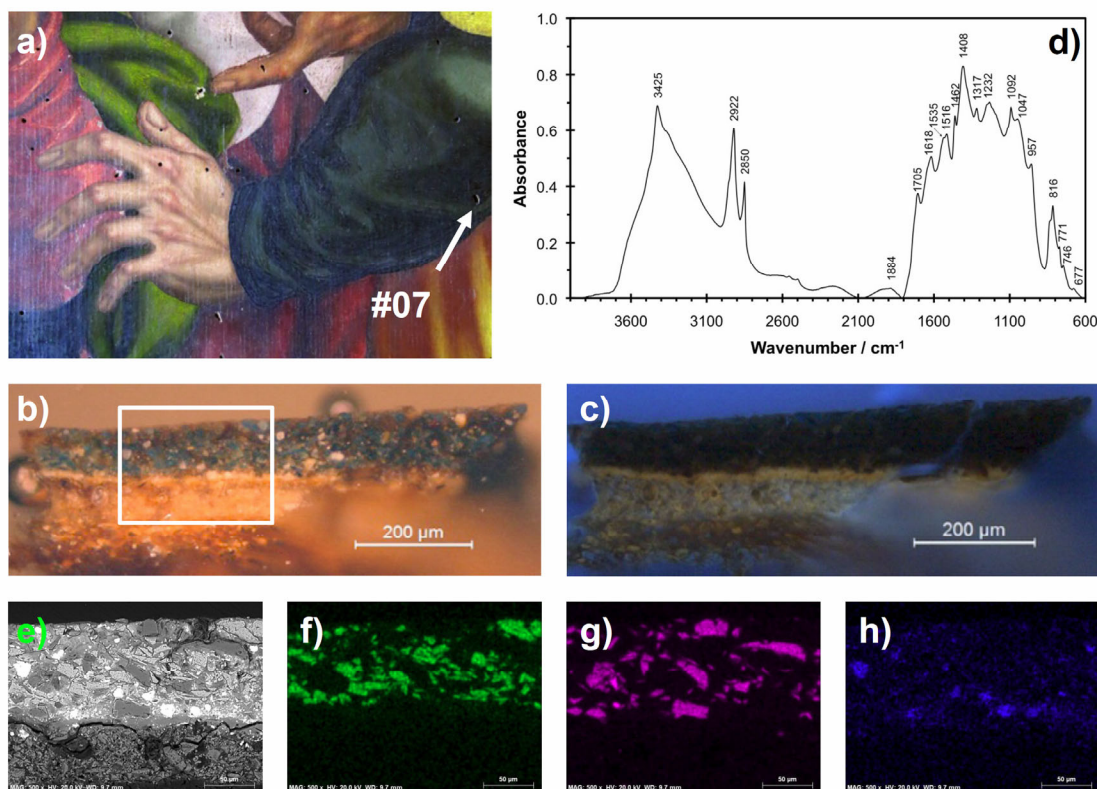

**Figure S9.** Detail of a blue drapery with location of sample #07 (a); cross section of sample #07 under OM-Vis (b); cross section of sample #07 under OM-UV (c); and FTIR spectrum of blue paint marked in b) with an arrow (d). According to the SEM-EDX results, the layer is rich azurite and smalt: SEM-BSE image of detail, marked in b), of cross-section of sample #07 (e); SEM-EDS maps of Cu (f), Si (g), and Pb (h). On the FTIR spectrum, azurite, as a basic copper carbonate, had characteristic  $\nu(\text{OH})$  bands around  $3425\text{ cm}^{-1}$ ;  $\nu(\text{CO}_3)$  bands at  $1408$ ,  $1092\text{ cm}^{-1}$ ; a  $\nu(\text{CO})$  band at  $957\text{ cm}^{-1}$ , and lastly,  $\delta(\text{OCO})$  bands at  $816$ ,  $771$ , and  $746\text{ cm}^{-1}$ . The band at  $1462\text{ cm}^{-1}$ , together with the doublet at  $1535$  and  $1516\text{ cm}^{-1}$  indicates the formation of both potassium (from the smalt) and lead soaps. The carbonyl  $\nu(\text{C}=\text{O})$  bands at  $1705\text{ cm}^{-1}$  along with two sharp bands at  $2922\text{ cm}^{-1}$  and  $2850\text{ cm}^{-1}$ , due respectively to stretching  $\text{CH}_3$  and  $\text{CH}_2$  vibrations, identify an aged oil. The band at  $1317\text{ cm}^{-1}$   $\nu_a(\text{C}-\text{O})$  indicates the presence of oxalates.

**Table S1.** List of samples collected and analytical methods performed.

1

| Sample number | Colour and location                                                                                                     | OM-Vis                                                                              | OM-UV                                                                                | SEM-EDX | FTIR | $\mu$ - RS | HPLC |
|---------------|-------------------------------------------------------------------------------------------------------------------------|-------------------------------------------------------------------------------------|--------------------------------------------------------------------------------------|---------|------|------------|------|
| #01           |  White<br>Magdalene's cloak            |    |    |         | ×    |            |      |
| #02           |  Yellow-greenish<br>Magdalene's tunic  |    |    | ×       | ×    | ×          |      |
| #03           |  Pink, dark<br>Magdalene's tunic       |    |    | ×       | ×    |            | ×    |
| #04           |  Flesh, mid-tone<br>Magdalene's eyelid |    |    | ×       | ×    | ×          |      |
| #05           |  Yellow<br>Tunic of apostle            |    |    | ×       | ×    |            |      |
| #06           |  Purple, dark<br>Belt of apostle      |   |   | ×       | ×    |            |      |
| #07           |  Blue, dark<br>Tunic of apostle      |  |  | ×       | ×    |            |      |
| #08           |  Orange<br>Tunic of apostle          |  |  |         |      | ×          |      |
| #09           |  Red, mid-tone<br>Tunic of apostle   |  |  | ×       |      | ×          |      |
| #10           |  Red, dark<br>Tunic of apostle       |  |  | ×       | ×    | ×          | ×    |
| #11           |  Green, dark<br>Apostle's cloak      |  |  | ×       |      |            |      |
| #12           |  Green, light<br>Apostle's cloak     |  |  |         |      |            |      |
| #13           |  Blue, light<br>Virgin's cloak       |  |  | ×       | ×    |            |      |

| Sample number | Colour and location                                                                                                          | OM-Vis                                                                              | OM-UV                                                                                | SEM-EDX | FTIR | μ - RS | HPLC |
|---------------|------------------------------------------------------------------------------------------------------------------------------|-------------------------------------------------------------------------------------|--------------------------------------------------------------------------------------|---------|------|--------|------|
| #14           |  Blue, dark<br>Virgin's cloak               |    |    |         |      |        |      |
| #15           |  Brown<br>S. John's hair                    |    |    |         |      |        |      |
| #16           |  Red, mid-tone<br>S. John's tunic           |    |    | ×       | ×    | ×      | ×    |
| #17           |  Burgundy red, deep<br>S. John's cloak      |    |    | ×       | ×    |        | ×    |
| #18           |  Burgundy red, light<br>S. John's cloak     |    |    |         |      |        |      |
| #19           |  Burgundy red, mid-tone<br>S. John's cloak |   |   | ×       | ×    | ×      | ×    |
| #20           |  Pink, light<br>Architecture, background  |  |  |         | ×    |        |      |
| #21           |  Blue-grey<br>Sky                         |  |  |         |      |        |      |
| #22           |  Blue, light<br>Sky                       |  |  | ×       |      |        |      |
| #23           |  Brown<br>Cross                           |  |  |         |      |        |      |
| #24           |  Blue grey<br>Sky with cross underneath   |  |  | ×       |      |        |      |
